# Supplementary material for: Small subpopulations of β-cells do not drive islet oscillatory [Ca2+] dynamics via gap junction communication
Source: PubMed Central journal article supplement (PMC8118513; doi:10.1371/journal.pcbi.1008948), 2021-05-03
Supplement: pcbi.1008948.s012.pdf [file pcbi.1008948.s012.pdf]

| <b>Parameter</b>      | <b>Description of parameter</b>                                                                                        | <b>Mean 'early phase' cell population</b> | <b>Mean 'non-early phase' cell population,</b> | <b>units</b>           |
|-----------------------|------------------------------------------------------------------------------------------------------------------------|-------------------------------------------|------------------------------------------------|------------------------|
| gKATP                 | Max conductance of K <sub>ATP</sub> channel current                                                                    | 2.3517                                    | 2.2930                                         | pA mV <sup>-1</sup>    |
| gKTO                  | Conductance of I <sub>KCa(BK)</sub> (voltage and Ca <sup>2+</sup> ) dependent transient outward K <sup>+</sup> current | 2.12521                                   | 2.12793                                        | pA mV <sup>-1</sup>    |
| P <sub>SERCA</sub>    | Maximum rate of pumping Ca <sup>2+</sup> into ER                                                                       | 0.09666                                   | 0.09586                                        | amole ms <sup>-1</sup> |
| P <sub>NaCa</sub>     | Maximum amplitude of I <sub>NaCa</sub> , Na <sup>+</sup> /Ca <sup>2+</sup> exchanger                                   | 204.98                                    | 203.84                                         | pA                     |
| P <sub>rel</sub>      | Converting factor for Ca <sup>2+</sup> release from ER                                                                 | 0.4548                                    | 0.4609                                         | fl ms <sup>-1</sup>    |
| P <sub>op</sub>       | Maximum rate of ATP production from oxphos                                                                             | 0.00049742                                | 0.00049957                                     | ms <sup>-1</sup>       |
| [ATP <sub>tot</sub> ] | Total amount of ATP species                                                                                            | 3.99813                                   | 4.00341                                        | mM                     |
| k <sub>glc</sub>      | Rate constant of glycolysis                                                                                            | 0.0001064                                 | 0.0001286                                      | ms <sup>-1</sup>       |
